# Supplementary material
Source: Research Square preprint supplement (doi:10.21203/rs.3.rs-9298986/v1)
Supplement: Supplementary file 1 [file 4181868a64a720ccc27e0eb3.xlsx]

## Sheet: Sheet1
Supplementary Table S1.Canonical marker genes used for cell-type annotation in single-cell RNA sequencing analysis.
cellMarker	Marker Genes
T_cells	CD3E, TRAC, CD3D
B_cells	MS4A1, CD79A, CD19
Plasma	MZB1, JCHAIN, IGHA1
Endothelial	PECAM1, VWF
Fibroblast	COL1A1, COL1A2, DCN
Epithelial	EPCAM, KRT7, KRT8
Myeloid	LYZ, CD14, SPI1
Tcm(T_cells)	IL7R, EEF1G, TCF7
Tem(T_cells)	GZMK, CXCR4
Tfh(T_cells)	CXCL13, PDCD1, ICOS
Trm(T_cells)	CXCR6, ZNF683
Treg(T_cells)	FOXP3, CTLA4
Tcyto(T_cells)	NKG7, GZMB, PRF1
Tpro(T_cells)	MKI67, TOP2A
Mono(Myeloid)	LST1, VCAN, LYZ
Macro(Myeloid)	C1QA, C1QB, CSF1R, APOE
mDC(Myeloid)	FCER1A, CLEC10A, CD1C, CST3
Neut(Myeloid)	S100A9, FCGR3B, S100A8, CSF3R
