# Supplementary material
Source: Research Square preprint supplement (doi:10.21203/rs.3.rs-9298986/v1)
Supplement: Supplementary file 2 [file 97fdd809e1468896f05be7a2.xlsx]

## Sheet: Sheet1
Supplementary Table S3. Summary of datasets used in this study.
Category	Dataset	Platform/Database	Data Source	Data Availability
Single-cell RNA sequencing	GSE308103	GEO	Gene Expression Omnibus (NCBI)	Publicly available
External validation cohort	GSE31210	GEO	GEO	Publicly available
External validation cohort	GSE50081	GEO	GEO	Publicly available
External validation cohort	GSE72094	GEO	GEO	Publicly available
Immunotherapy cohort	GSE135222	GEO	GEO	Publicly available
Bulk RNA-seq and clinical data	TCGA-LUAD	TCGA	The Cancer Genome Atlas	Publicly available (via data portal)
Spatial transcriptomics	E-MTAB-13530	ArrayExpress	EMBL-EBI ArrayExpress	Publicly available
Immunotherapy dataset	POPLAR	Roche / Data provider	Clinical trial data platform	Controlled access
Immunotherapy dataset	OAK	Roche / Data provider	Clinical trial data platform	Controlled access
