# Supplementary material
Source: Research Square preprint supplement (doi:10.21203/rs.3.rs-9298986/v1)
Supplement: Supplementary file 3 [file b68240c6c691605aff906f5f.xlsx]

## Sheet: Sheet1
Supplementary Table S2. Sequences of siRNAs and primers used in this study.
	Forward (5’-3’)	Reverse (5’-3’)
si-RNA
NC-SLC2A1	UUCUCCGAACGUGUCACGUTT	ACGUGACACGUUCGGAGAATT
Si1-SLC2A1	CCTGCAGTTTGGCTACAACA	GTGGACCCATGTCTGGTTG
Si2-SLC2A1	GCUCUGUUGAUGAAGAUUATT	UAAUCUUCAUCAACAGAGCTT
Si3-SLC2A1	CCUUGUGCUUCAACAUCAATT	UUGAUGUUGAAGCACAAGGTT
RT-PCR
SLC2A1	TGGCATCAACGCTGTCTTCT	AACAGCGACACGACAGTGAA
GAPDH	GAAGGTGAAGGTCGGAGTC	GAAGATGGTGATGGGATTTC
